# Supplementary material
Source: publisher site journal article supplement (https://www.dovepress.com/article/280616)

### Figure S1. The timeline from the time of injury to the final surgery

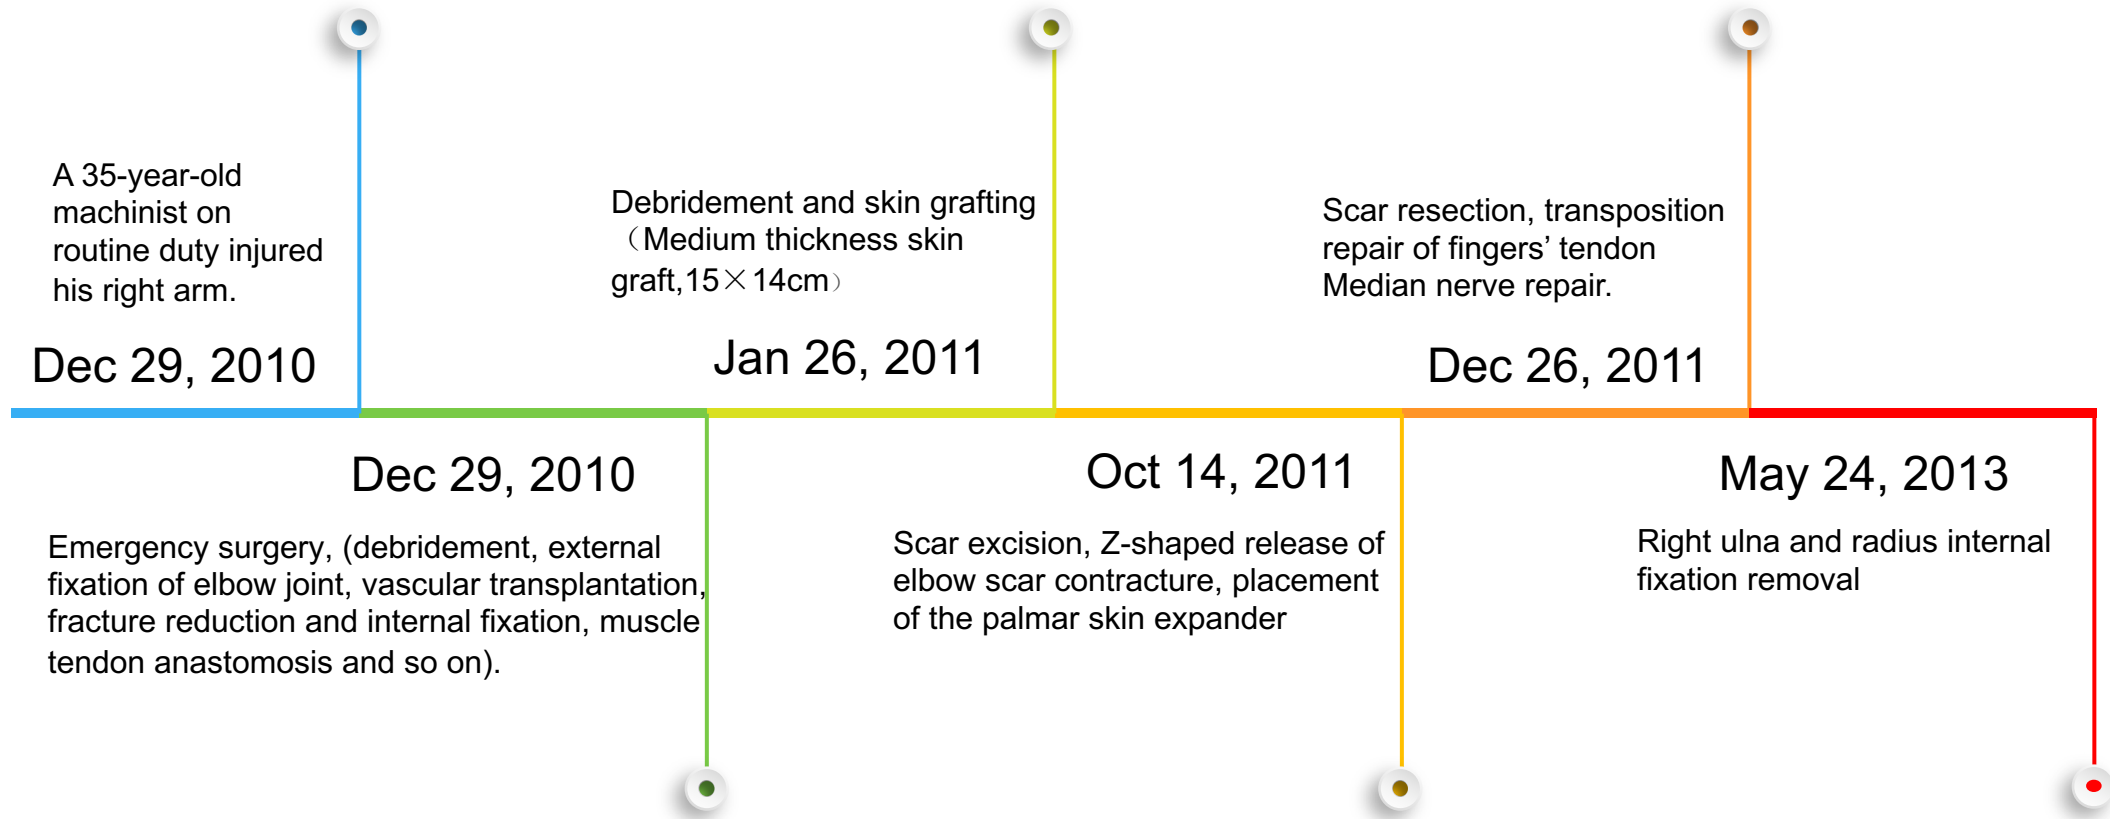

Supplement: Supplementary file 1 [file get_supplementary_file.php]
